# Supplementary material
Source: HighWire-hosted journal article supplement (https://bmjopen.bmj.com/content/10/9/e037633)
Supplement: inline-supplementary-material-1 [file inline-supplementary-material-1.pdf]

**Draft of the preliminary search strategy. PubMed (NBCI)191114****Population**

|    |                |                                  |         |
|----|----------------|----------------------------------|---------|
| #1 | Title/abstract | Famil*                           | 1064402 |
| #2 | MESH           | Family (MESH)                    | 309483  |
| #3 | Title/abstract | Next of kin                      | 1391    |
| #4 | Title/abstract | Relative*                        | 1357149 |
| #5 | Title/abstract | Partner*                         | 167087  |
| #6 | Title/abstract | Couple*                          | 350174  |
| #7 | OR             | #1 OR #2 OR #3 OR #4 OR #5 OR #6 | 2932304 |

**Concept**

|     |                |                                      |        |
|-----|----------------|--------------------------------------|--------|
| #8  | Title/abstract | Support                              | 953773 |
| #9  | Title/abstract | "Support intervention"               | 966    |
| #10 | Title/abstract | "Nursing intervention"               | 2373   |
| #11 | Title/abstract | Family centered care                 | 1515   |
| #12 | MESH           | Family Nursing                       | 1435   |
| #13 | Title/abstract | "Support model"                      | 564    |
| #14 | OR             | #8 OR #9 OR #10 OR #11 OR #12 OR #13 | 957897 |

**Context**

|     |                |                                 |         |
|-----|----------------|---------------------------------|---------|
| #15 | Title/abstract | Cancer*                         | 1723541 |
| #16 | MESH           | Neoplasm                        | 3271117 |
| #17 | Title/abstract | Neoplasm*                       | 268818  |
| #18 | Title/abstract | Oncology                        | 96946   |
| #19 | Title/abstract | Oncological*                    | 23082   |
| #20 | OR             | #15 OR #16 OR #17 OR #18 OR #19 | 3779871 |

|     |     |             |         |
|-----|-----|-------------|---------|
| #21 | AND | #7 AND #14  | 3691910 |
| #22 | AND | #20 AND #21 | 423935  |
